# Supplementary material for: A far-red to NIR emitting ultra-sensitive probe for the detection of endogenous HOCl in zebrafish and the RAW 264.7 cell line
Source: Royal Society of Chemistry journal article supplement (doi:10.1039/c9ob00143c), 2019-01-01
Supplement: c9ob00143c1.pdf [file c9ob00143c1.pdf]

## Far-red to NIR emitting ultra-sensitive probe to detect the endogenous HOCl in zebrafish and Raw 264.7 cell line

Natarajan Vijay <sup>a</sup>, Natesan Thirumalaivasan <sup>b</sup>, Shu-Pao Wu <sup>b</sup>, Sivan Velmathi\* <sup>a</sup>

<sup>a</sup> Organic and Polymer Synthesis Laboratory, Department of Chemistry, National Institute of Technology, Tiruchirappalli - 620 015, India.

<sup>b</sup> Department of Applied Chemistry, National Chiao Tung University, Hsinchu, Taiwan-300.

### Supporting information

Figure S1. <sup>1</sup>H NMR spectrum of Isophorone with malononitrile

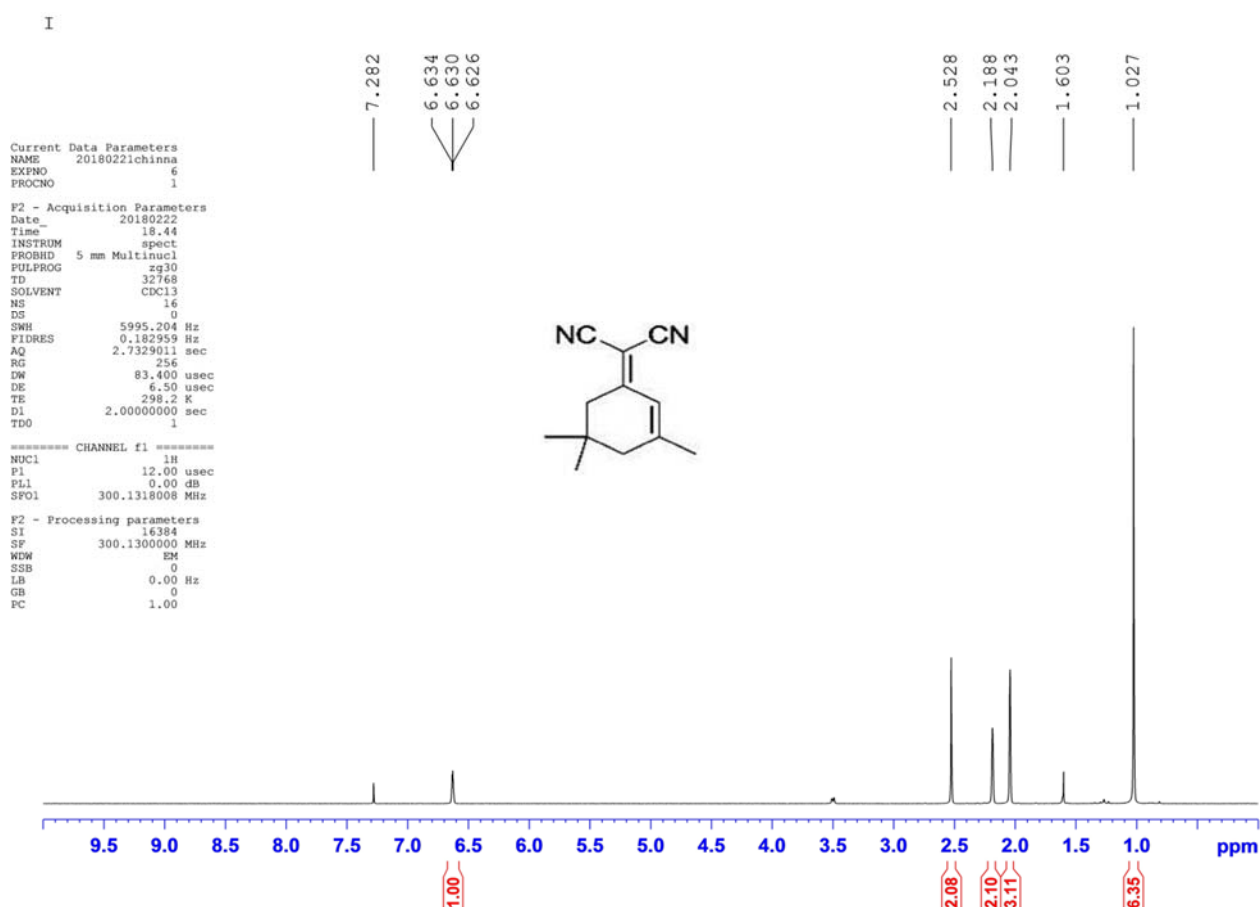

Figure S2. <sup>1</sup>H NMR spectrum of n-butylated phenothiazine

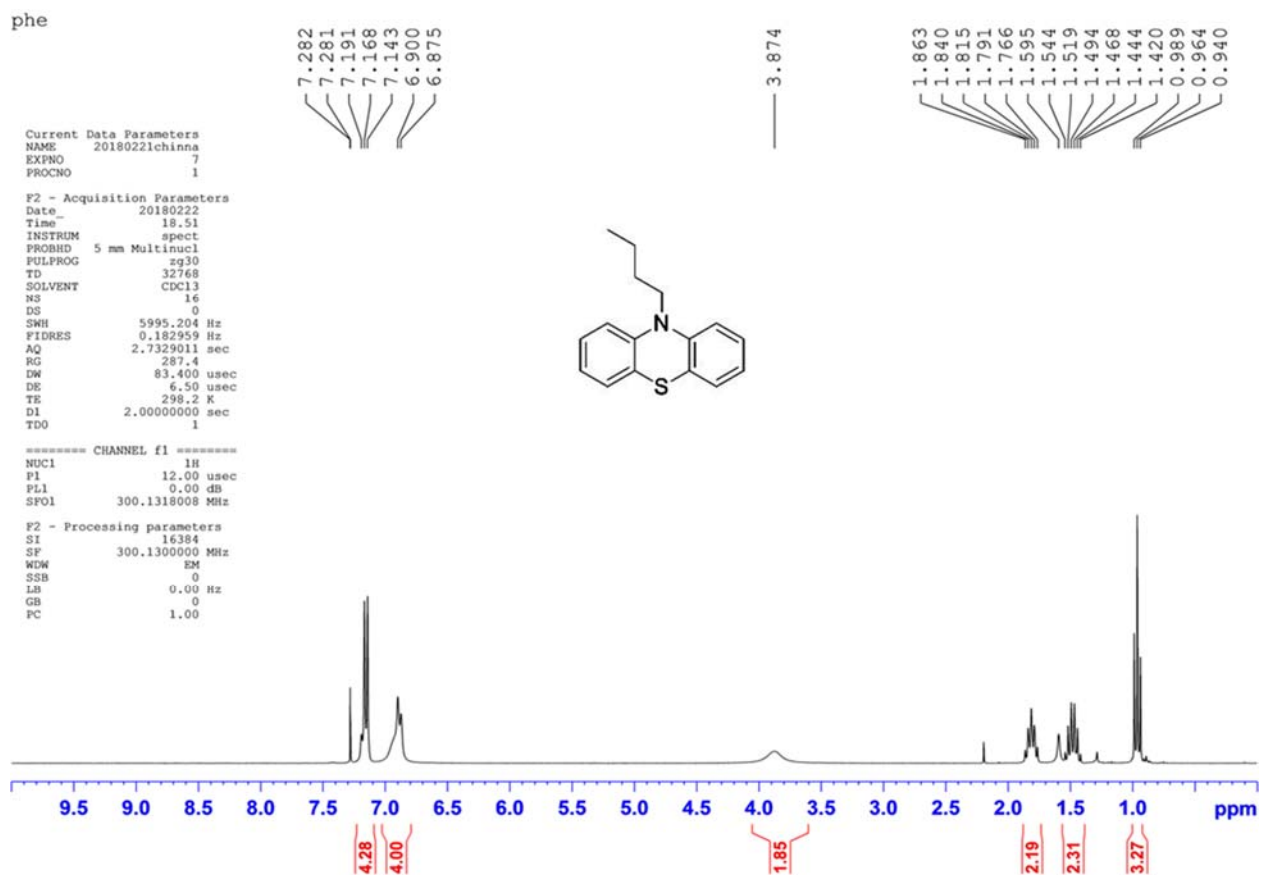

Figure S3. <sup>1</sup>H NMR spectrum of formyl phenothiazine

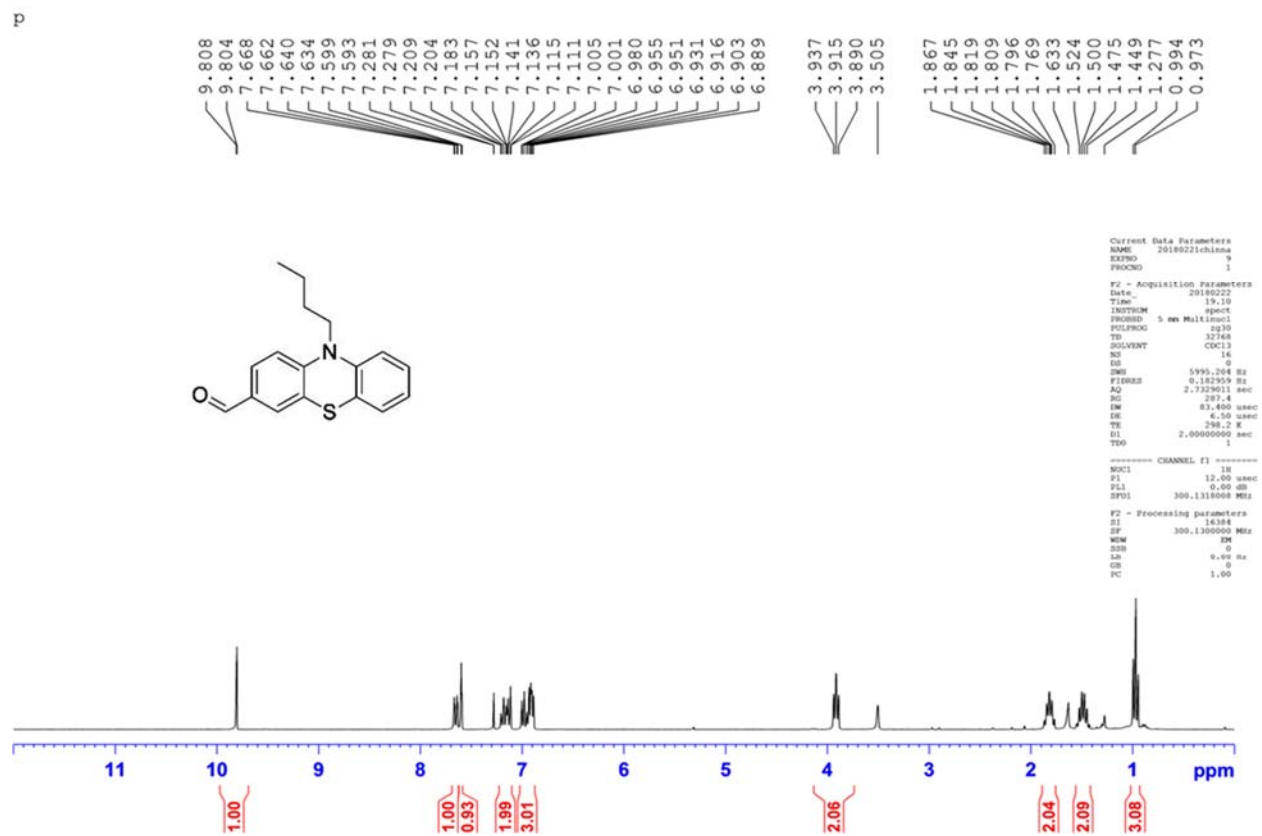

Figure S4.  $^1\text{H}$  NMR spectrum of PI

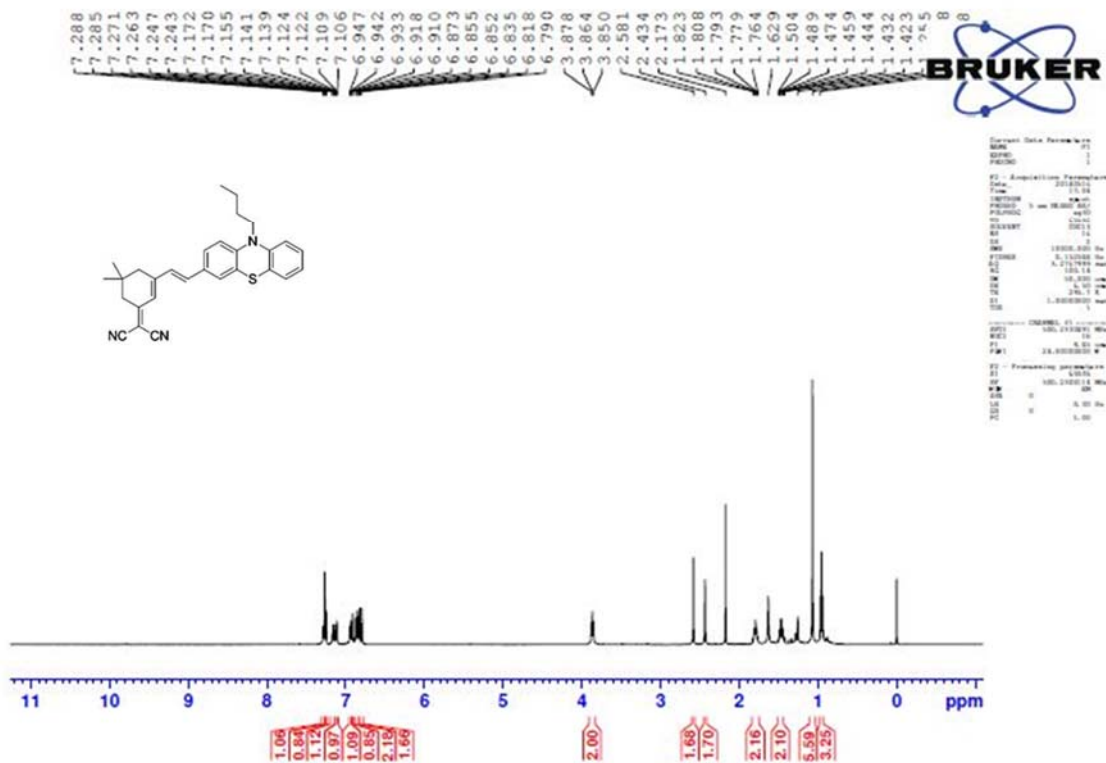



Figure S6. <sup>13</sup>C NMR spectrum of PI

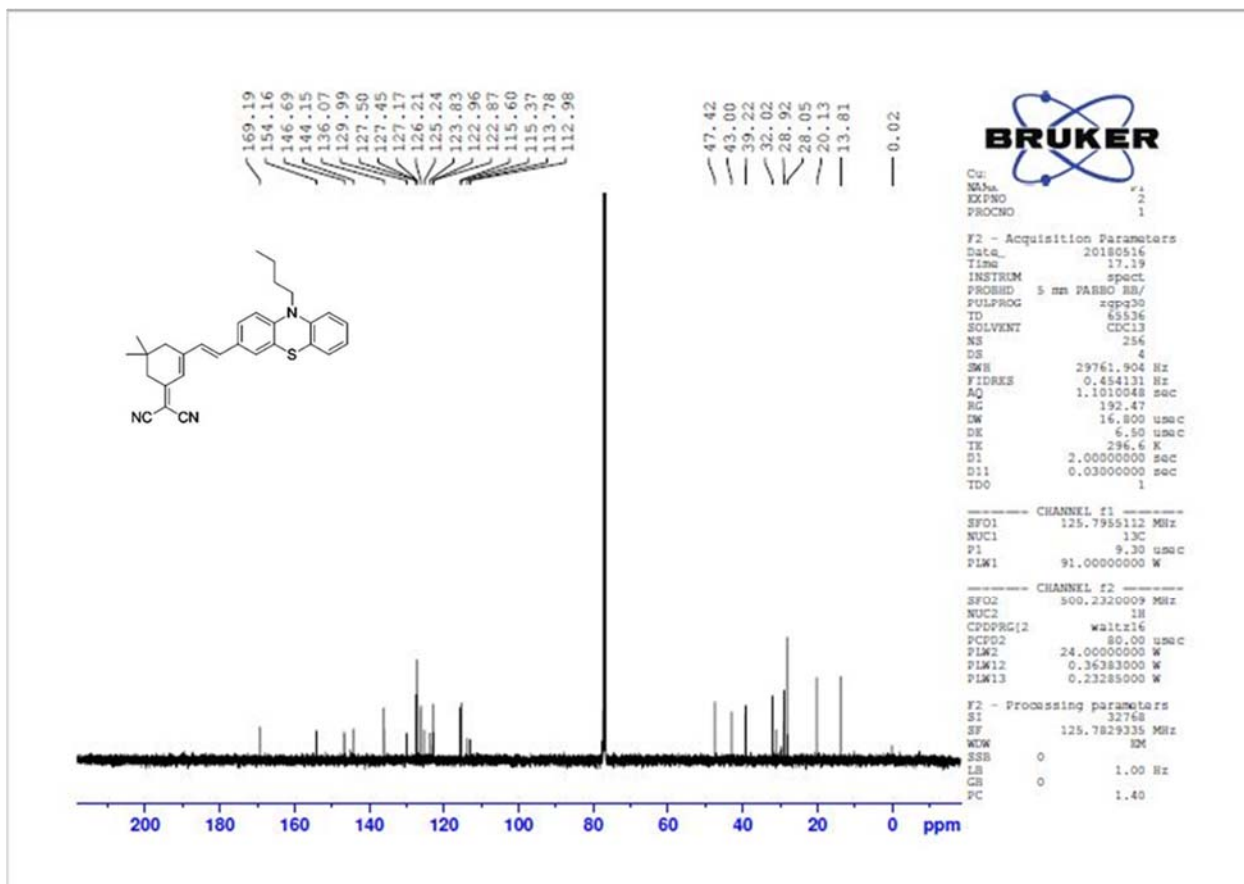

Figure S7. DEPT 135 <sup>13</sup>CNMR spectrum of PI

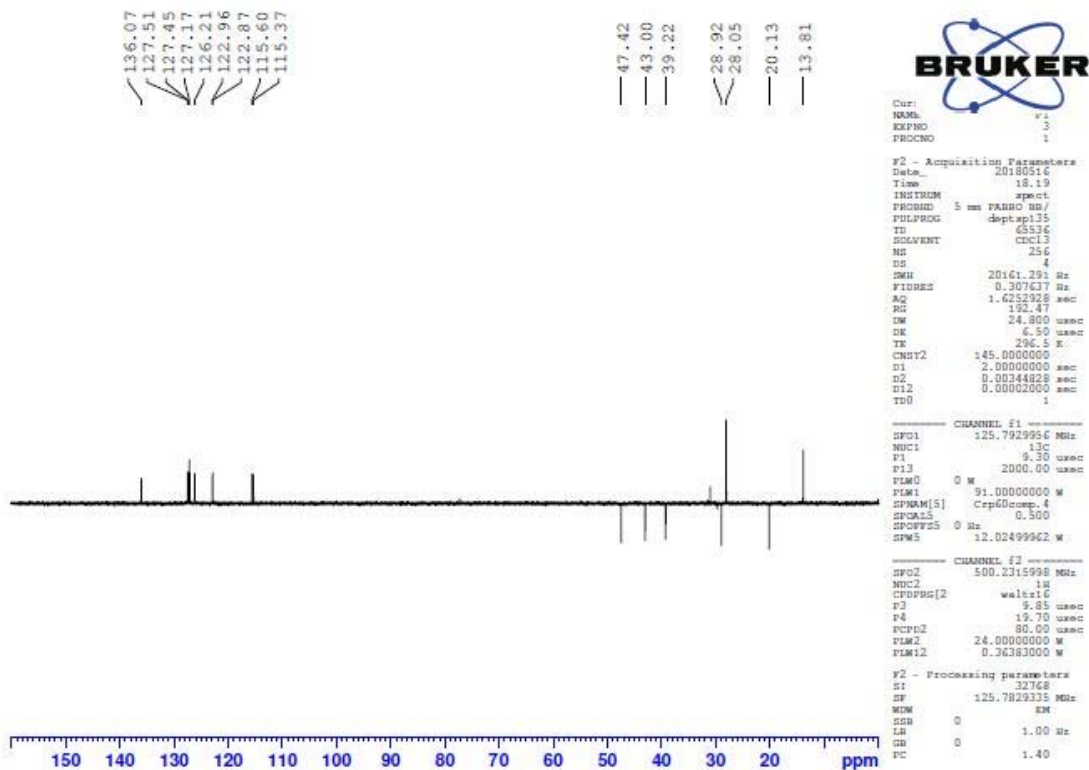

Figure S8. MeOH/water solvent ratio with 100  $\mu$ M HOCl

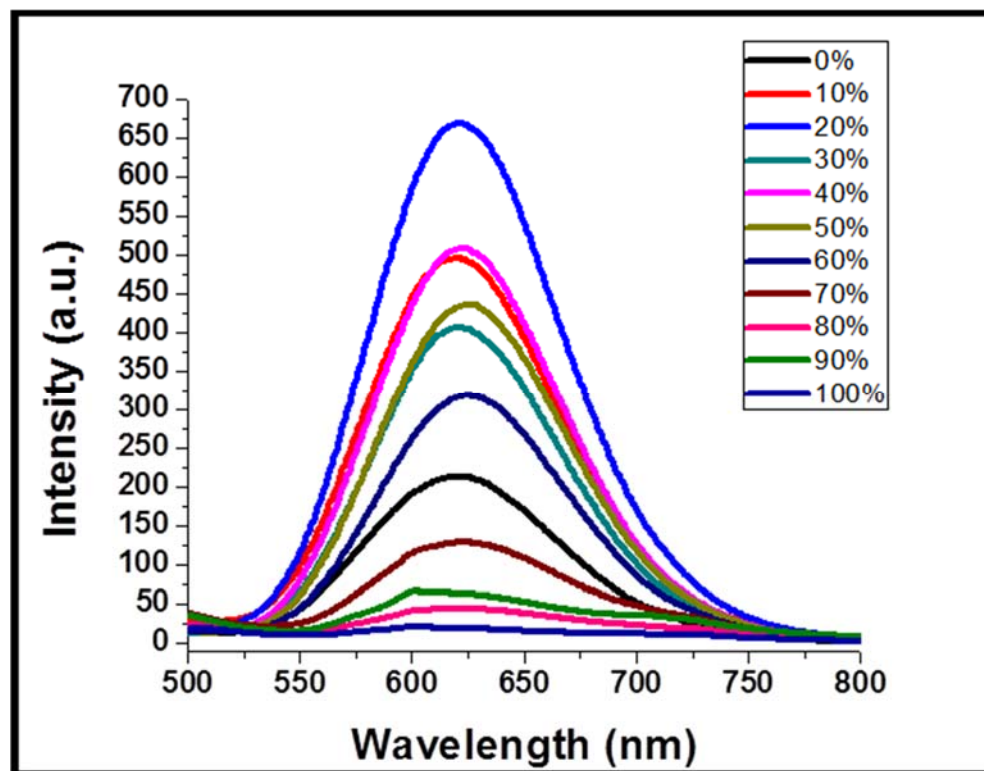



**Figure S9.** Fluorescence intensity of PI (20  $\mu\text{M}$ ) with HOCl (100  $\mu\text{M}$ ) at 620 nm in 20% aq. MeOH in various pH.

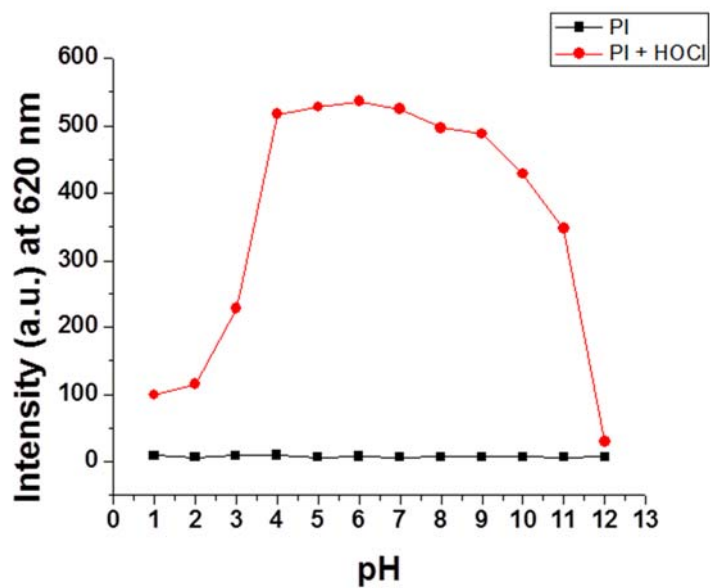

**Figure S10.** Detection limit plot

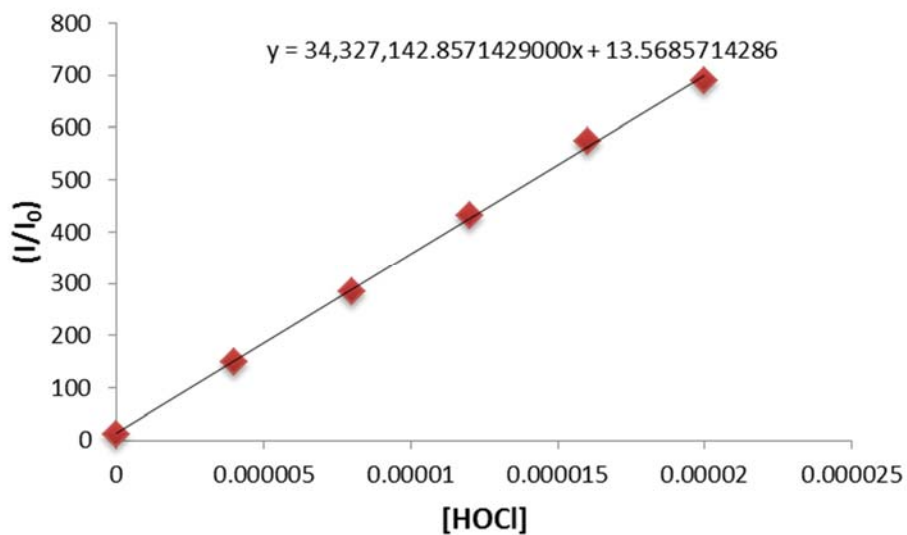

**Figure S11.** ESI mass spectrum of PI

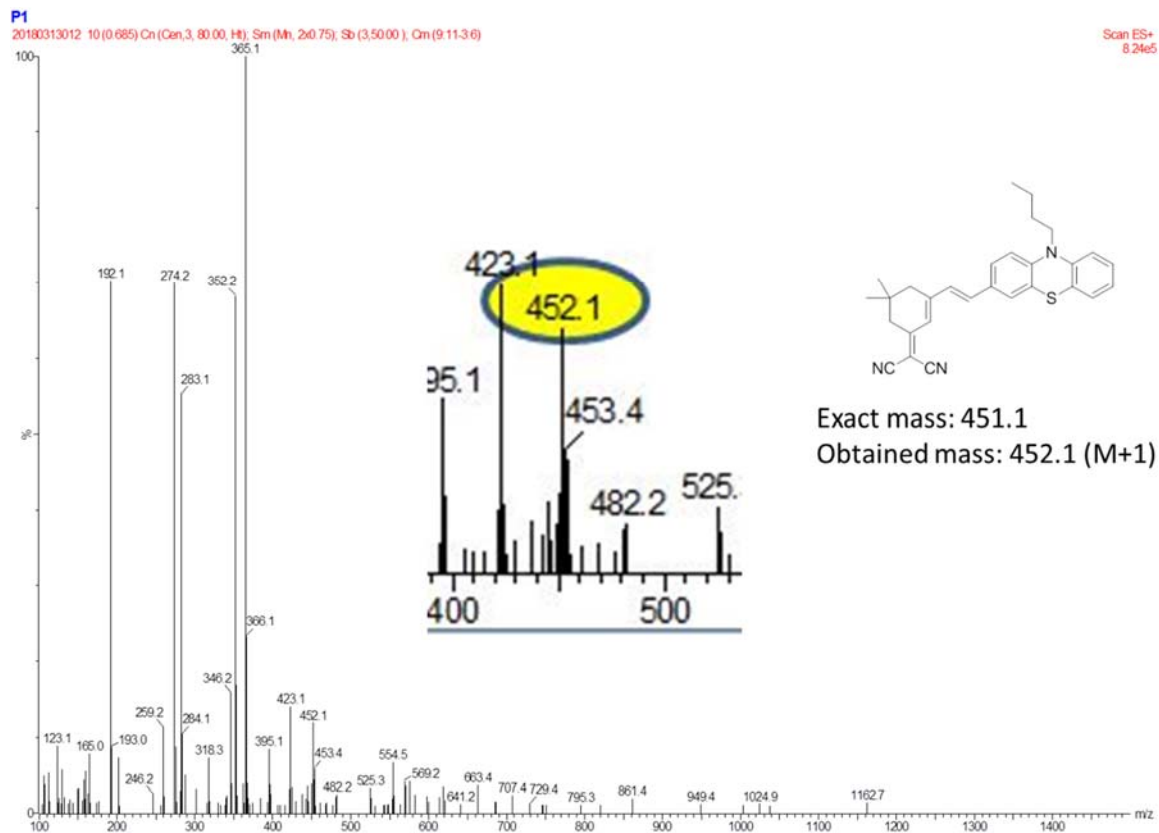

**Figure S12.** ESI mass spectrum of PI with HOCl

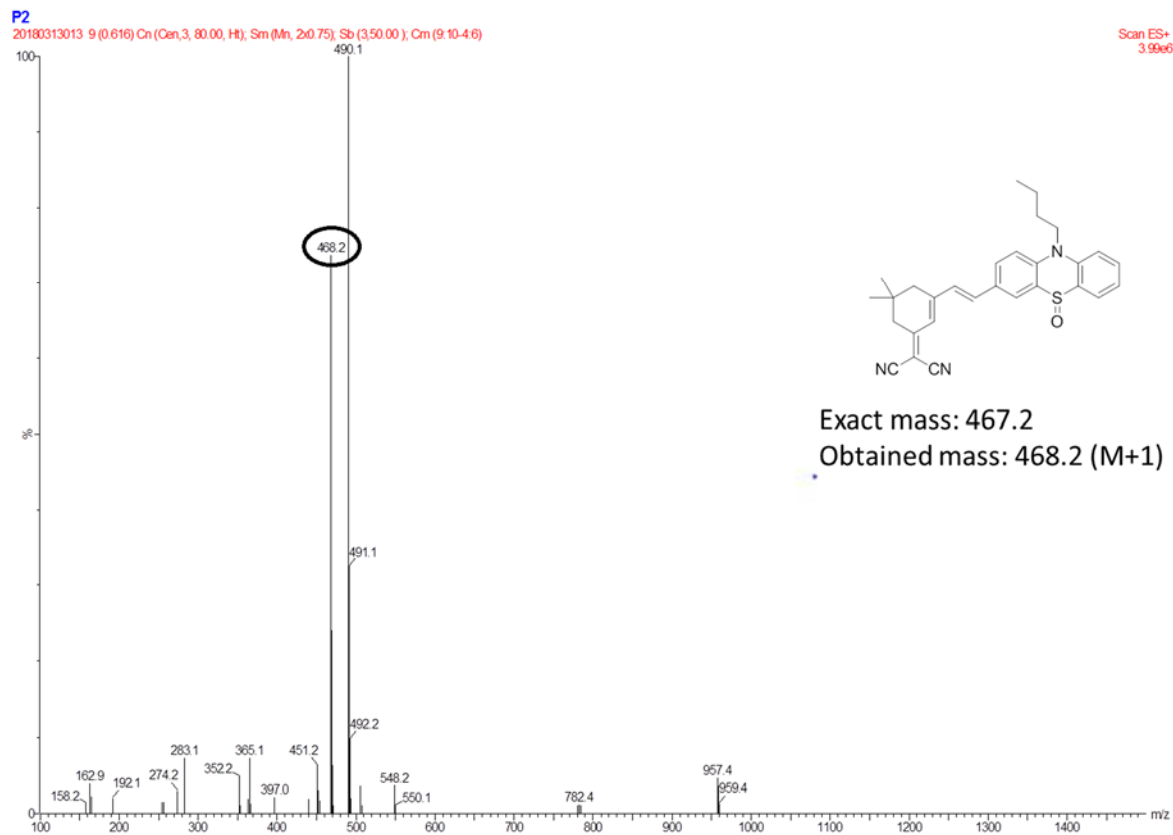

**Figure S13.** GSH interference with oxidized probe (20  $\mu\text{M}$  probe in 20% aqueous methanol added with 100  $\mu\text{M}$  HOCl and GSH)

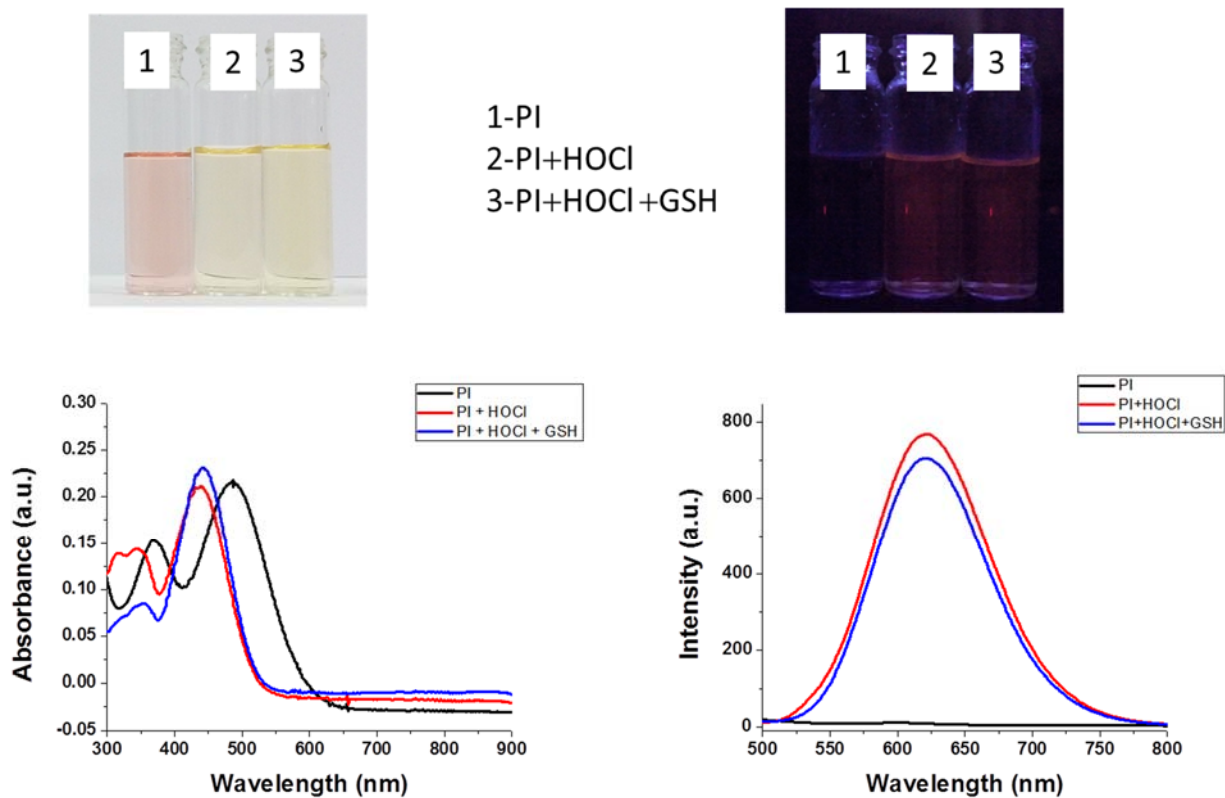

**Table S1.** A comparison of the detection limit with some other previously reported HOCl probes

| PROBE FOR HOCl                                | DETECTION LIMIT                              |
|-----------------------------------------------|----------------------------------------------|
| Probe reported by Suhua Wang <sup>1</sup>     | 0.13 and 0.70 $\mu\text{M}$                  |
| Probe reported by Bao-Xiang Zhao <sup>2</sup> | 0.19 $\mu\text{M}$                           |
| Probe reported by Bao-Xiang Zhao <sup>3</sup> | 0.21 $\mu\text{M}$                           |
| <b>Our probe PI</b>                           | <b>42 nM (0.042<math>\mu\text{M}</math>)</b> |

**Table S2.** Quantum yield calculation for the probe PI 20  $\mu$ M with 100  $\mu$ M HOCl

| S.NO | Compound    | Area of Fluorescence spectrum | Absorbance | Reference quantum yield | Quantum yield |
|------|-------------|-------------------------------|------------|-------------------------|---------------|
| 1.   | PI          | 19                            | 207        | <b>0.95</b>             | 0.0156        |
| 2.   | PI + HOCl   | <b>462</b>                    | <b>214</b> |                         | <b>0.3679</b> |
| 3.   | Rhodamine B | 11466                         | 2.057      |                         | 0.95          |

Quantum yield is calculated using the following formula:

$$\Phi_S / \Phi_R = (I_S / I_R) \times [(1 - 10^{-AR}) / (1 - 10^{-AS})] \times (n_S^2 / n_R^2)$$

$\Phi_S$  – Quantum yield of the sample;  $\Phi_R$  – Quantum yield of reference

I - Fluorescence intensity of sample (S) and reference (R); A- Absorbance of sample (S) and reference (R); n- Refractive index of the solvent used ; As quantum yield is temperature dependent, in both the cases temperature maintained same.

1. M. Sun, H. Yu, H. Zhu, F. Ma, S. Zhang, D. Huang and S. Wang, *Anal. Chem.*, 2013, **86**, 671-677.
2. L.-L. Xi, X.-F. Guo, C.-L. Wang, W.-L. Wu, M.-F. Huang, J.-Y. Miao and B.-X. Zhao, *Sensors Actuators B: Chem.*, 2018, **255**, 666-671.
3. Y.-R. Zhang, Z.-M. Zhao, L. Su, J.-Y. Miao and B.-X. Zhao, *RSC Adv.*, 2016, **6**, 17059-17063.
